# Supplementary material for: Titanium Dioxide Nanoparticles Increase Sensitivity in the Next Generation of the Water Flea Daphnia magna
Source: PubMed Central journal article supplement (PMC3492132; doi:10.1371/journal.pone.0048956), 2012-11-07

Supplementary Information Figure S3. 96 h-EC<sub>50</sub> values with respective 95% CIs of the fifth brood released by adults exposed to P25-nTiO<sub>2</sub> during the flow-through experiment (first set of experiments); Asterisk (\*) denotes statistically significant difference between the juveniles released from adults exposed to 2.00 mg/L TiO<sub>2</sub> and the control based on confidence interval testing (difference between 96 h-EC<sub>50</sub> values 4.39 mg/L, 95% CI 0.62 to 8.15).

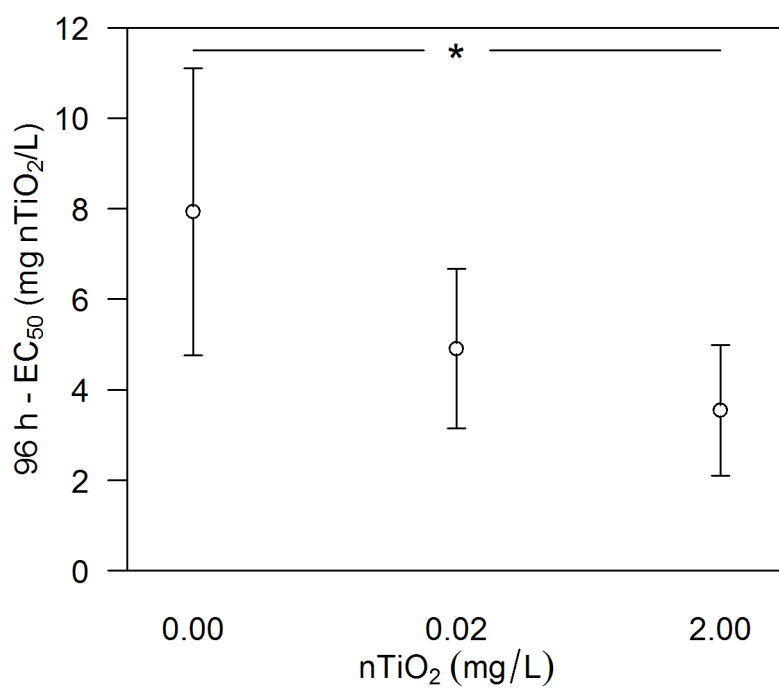

Supplement: pone.0048956.s003.pdf [file pone.0048956.s003.pdf]
