# Supplementary material for: Titanium Dioxide Nanoparticles Increase Sensitivity in the Next Generation of the Water Flea Daphnia magna
Source: PubMed Central journal article supplement (PMC3492132; doi:10.1371/journal.pone.0048956), 2012-11-07
Supplement: pone.0048956.s005.pdf [file pone.0048956.s005.pdf]

Table S1. Particle characteristics of P25 and A-100: The table displays the 10<sup>th</sup> and the 90<sup>th</sup> percentile of the particle size distribution, the mean percentage of particles below a particle size of 100 nm as well as the mean particle size together with the polydispersity index. This index provides information on the range of the particle size distribution. A value above 0.3 indicates unreliability of the measurement, due to masking of small particles by large ones. Additionally the zeta potential of the particles and their measured concentration in the test medium is given. nTiO<sub>2</sub> concentrations were measured following Dabrunz et al.<sup>1</sup>.

| product | mean (±SD; n)<br>particle size<br>nm | 10 <sup>th</sup> percentile<br>(mean±SD; n) of<br>particle size distribution<br>nm | 90 <sup>th</sup> percentile<br>(mean±SD; n) of<br>particle size distribution<br>nm | mean percentage<br>(mean±SD; n) of<br>particles below a size of<br>100 nm | polydispersity<br>index<br>PI | mean (±SD; n)<br>zeta potential<br>mV | nominal<br>concentration<br>mg/L | mean (±SD; n) measured<br>concentration<br>mg/L |                      |                      |
|---------|--------------------------------------|------------------------------------------------------------------------------------|------------------------------------------------------------------------------------|---------------------------------------------------------------------------|-------------------------------|---------------------------------------|----------------------------------|-------------------------------------------------|----------------------|----------------------|
|         |                                      |                                                                                    |                                                                                    |                                                                           |                               |                                       |                                  | 1 <sup>st</sup> week                            | 2 <sup>nd</sup> week | 3 <sup>rd</sup> week |
| P25     | 135.8<br>(±14.1; 30)                 | 76.2<br>(±7.4; 30)                                                                 | 251.5<br>(±57.8; 30)                                                               | 31.30<br>(±6.62; 30)                                                      | 0.181-0.270                   | -19.46<br>(±0.41; 3)                  | 0.00                             | 0                                               | 0                    | 0                    |
|         |                                      |                                                                                    |                                                                                    |                                                                           |                               |                                       | 2.00                             | 1.62<br>(±0.07; 3)                              | 1.64<br>(±0.02; 3)   | 1.90<br>(±0.03; 3)   |
| A-100   | 143.2<br>(±23.9; 22)                 | 74.8<br>(±6.4; 22)                                                                 | 285.6<br>(±103.9; 22)                                                              | 31.89<br>(±5.01; 22)                                                      | 0.143-0.284                   | -16.75<br>(±0.29; 3)                  | 0.00                             | 0                                               | 0                    | 0                    |
|         |                                      |                                                                                    |                                                                                    |                                                                           |                               |                                       | 2.00                             | 2.34<br>(±0.26; 3)                              | 2.39<br>(±0.17; 3)   | 2.42<br>(±0.07; 3)   |

## Reference

1. Dabrunz A, Duyster L, Prasse C, Seitz F, Rosenfeldt RR, Schilde R, Schaumann GE, Schulz R (2011) Biological surface coating and molting inhibition as mechanisms of TiO<sub>2</sub> nanoparticle toxicity in *Daphnia magna*. PLoS One 6: e20112.
